# Supplementary material
Source: publisher site journal article supplement (https://www.dovepress.com/get_supplementary_file.php?f=322221.docx)
Supplement: Supplementary file 1 [file get_supplementary_file.php]

| **Table S1.** Venous thromboembolic and major bleeding events in patients receiving apixaban or warfarin for VTE treatment with the adjusted odds ratios from the doubly robust models after propensity score weighting (PSW) | | | | | |
| --- | --- | --- | --- | --- | --- |
| **Outcome** | **Apixaban**  **N=187** | **Warfarin**  **N=239** | ***p*-value*** | **COR (95%CI)†** | **AOR (95%CI)†** |
| VTE events | 28 (15.0) | 35 (14.6) | 0.924 | 1.02 (0.59 – 1.76) | 0.85 (0.49 - 1.48) |
| DVT | 17 (9.1) | 19 (8.0) | 0.674 | 1.16 (0.58 – 2.30) | 1.10 (0.57 - 2.12) |
| PE | 9 (4.8) | 14 (5.9) | 0.636 | 0.81 (0.34 – 1.92) | 0.61 (0.23 - 1.61) |
| DVT+PE | 2 (1.1) | 2 (0.8) | 0.804 | 1.28 (0.18 – 9.20) | 1.42 (0.37 - 5.42) |
| Major bleeding | 2 (1.1) | 14 (5.9) | **0.009** | **0.17 (0.04 – 0.77)** | **0.22 (0.07 - 0.73)** |
| Numbers are presented as number of patients with events (percentage).  * *p*-values were from chi-squared test; and numbers in bold represent significant results.  **†** CORs are from the univariate logistic regression  **‡** AORs are from the doubly robust models using weight from PSW and adjusted for all baseline characteristics, comorbidities, and concurrent medications used which all were listed in Table 1.  Abbreviations: VTE, venous thromboembolism; PSW: propensity score weighting; COR: crude odds ratio; AOR: adjusted odds ratio; 95%CI: 95% confidence interval; DVT: deep vein thrombosis; PE: pulmonary embolism. | | | | | |
